# Supplementary material for: Repeatability of standard metabolic rate and gas exchange characteristics in a highly variable cockroach,Perisphaeriasp.
Source: Oxford University Press journal article supplement (doi:10.1242/jeb.00700), 2003-11-10
Supplement: jeb00700-sup-suptable.pdf [file jeb00700-sup-suptable.pdf]

**Supplemental Data**

Appendix 1A. ANOVA table used to calculate the repeatability values and their upper and lower 95% confidence limits for each of the components of the cyclic patterns, as well as comparable components across all three of the cyclic patterns, metabolic rate, frequency and body mass

| Components                        | Source of variation | d.f. | SS                    | MS                     | F-ratio | P                      | r    | Lower confidence limit | Upper confidence limit |
|-----------------------------------|---------------------|------|-----------------------|------------------------|---------|------------------------|------|------------------------|------------------------|
| DGC volume                        |                     |      |                       |                        |         |                        |      |                        |                        |
| C-period [log <sub>10</sub> (+2)] | Among groups        | 8    | 1.01×10 <sup>-7</sup> | 1.26×10 <sup>-8</sup>  | 2.29    | 0.03                   | 0.16 | 0.01                   | 0.47                   |
|                                   | Within groups       | 53   | 2.92×10 <sup>-7</sup> | 5.51×10 <sup>-9</sup>  |         |                        |      |                        |                        |
|                                   | Total               | 61   | 3.93×10 <sup>-7</sup> |                        |         |                        |      |                        |                        |
| F-period (log <sub>10</sub> )     | Among groups        | 8    | 4.32                  | 0.54                   | 5.37    | 5.78×10 <sup>-5</sup>  | 0.40 | 0.19                   | 0.70                   |
|                                   | Within groups       | 53   | 5.33                  | 0.10                   |         |                        |      |                        |                        |
|                                   | Total               | 61   | 9.65                  |                        |         |                        |      |                        |                        |
| O-period (log <sub>10</sub> )     | Among groups        | 8    | 1.76                  | 0.22                   | 13.13   | 3.2×10 <sup>-10</sup>  | 0.65 | 0.44                   | 0.85                   |
|                                   | Within groups       | 53   | 0.89                  | 0.02                   |         |                        |      |                        |                        |
|                                   | Total               | 61   | 2.65                  |                        |         |                        |      |                        |                        |
| DGC duration                      |                     |      |                       |                        |         |                        |      |                        |                        |
| C-period                          | Among groups        | 8    | 1.58×10 <sup>6</sup>  | 1.97×10 <sup>5</sup>   | 2.49    | 0.02                   | 0.18 | 0.03                   | 0.50                   |
|                                   | Within groups       | 53   | 4.21×10 <sup>6</sup>  | 7.94×10 <sup>4</sup>   |         |                        |      |                        |                        |
|                                   | Total               | 61   | 5.79×10 <sup>6</sup>  |                        |         |                        |      |                        |                        |
| F-period                          | Among groups        | 8    | 2.19×10 <sup>6</sup>  | 2.74×10 <sup>5</sup>   | 6.92    | 3.34×10 <sup>-6</sup>  | 0.47 | 0.26                   | 0.75                   |
|                                   | Within groups       | 53   | 2.09×10 <sup>6</sup>  | 3.95×10 <sup>4</sup>   |         |                        |      |                        |                        |
|                                   | Total               | 61   | 4.28×10 <sup>6</sup>  |                        |         |                        |      |                        |                        |
| O-period (log <sub>10</sub> )     | Among groups        | 8    | 0.94                  | 0.12                   | 6.77    | 4.41×10 <sup>-6</sup>  | 0.47 | 0.25                   | 0.75                   |
|                                   | Within groups       | 53   | 0.92                  | 0.02                   |         |                        |      |                        |                        |
|                                   | Total               | 61   | 1.86                  |                        |         |                        |      |                        |                        |
| DGC emission rate                 |                     |      |                       |                        |         |                        |      |                        |                        |
| C-period                          | Among groups        | 8    | 1.42×10 <sup>-8</sup> | 1.78×10 <sup>-9</sup>  | 7.38    | 1.52×10 <sup>-6</sup>  | 0.49 | 0.27                   | 0.76                   |
|                                   | Within groups       | 53   | 1.28×10 <sup>-8</sup> | 2.41×10 <sup>-10</sup> |         |                        |      |                        |                        |
|                                   | Total               | 61   | 2.70×10 <sup>-8</sup> |                        |         |                        |      |                        |                        |
| F-period (log <sub>10</sub> )     | Among groups        | 8    | 1.13                  | 0.14                   | 5.81    | 2.55×10 <sup>-5</sup>  | 0.42 | 0.21                   | 0.71                   |
|                                   | Within groups       | 53   | 1.29                  | 0.02                   |         |                        |      |                        |                        |
|                                   | Total               | 61   | 2.42                  |                        |         |                        |      |                        |                        |
| O-period                          | Among groups        | 8    | 3.38×10 <sup>-6</sup> | 4.32×10 <sup>-7</sup>  | 14.07   | 9.93×10 <sup>-11</sup> | 0.66 | 0.46                   | 0.86                   |
|                                   | Within groups       | 53   | 1.59×10 <sup>-6</sup> | 3.01×10 <sup>-8</sup>  |         |                        |      |                        |                        |
|                                   | Total               | 61   | 4.97×10 <sup>-6</sup> |                        |         |                        |      |                        |                        |
| Interburst–Burst volume           |                     |      |                       |                        |         |                        |      |                        |                        |
| Burst (log <sub>10</sub> )        | Among groups        | 10   | 5.23                  | 0.52                   | 10.09   | 2.76×10 <sup>-11</sup> | 0.50 | 0.32                   | 0.74                   |
|                                   | Within groups       | 93   | 4.82                  | 0.05                   |         |                        |      |                        |                        |
|                                   | Total               | 103  | 10.05                 |                        |         |                        |      |                        |                        |
| Interburst (log <sub>10</sub> )   | Among groups        | 10   | 21.99                 | 2.20                   | 13.22   | 4.14×10 <sup>-14</sup> | 0.57 | 0.39                   | 0.79                   |
|                                   | Within groups       | 93   | 15.46                 | 0.17                   |         |                        |      |                        |                        |
|                                   | Total               | 103  | 37.45                 |                        |         |                        |      |                        |                        |
| Interburst–Burst duration         |                     |      |                       |                        |         |                        |      |                        |                        |
| Burst                             | Among groups        | 10   | 3.39×10 <sup>6</sup>  | 3.39×10 <sup>5</sup>   | 5.93    | 6.92×10 <sup>-7</sup>  | 0.35 | 0.19                   | 0.61                   |
|                                   | Within groups       | 93   | 5.31×10 <sup>6</sup>  | 5.71×10 <sup>4</sup>   |         |                        |      |                        |                        |
|                                   | Total               | 103  | 8.70×10 <sup>6</sup>  |                        |         |                        |      |                        |                        |
| Interburst                        | Among groups        | 10   | 6.74×10 <sup>6</sup>  | 6.74×10 <sup>5</sup>   | 2.64    | 7.00×10 <sup>-3</sup>  | 0.15 | 0.04                   | 0.39                   |
|                                   | Within groups       | 93   | 2.37×10 <sup>7</sup>  | 2.55×10 <sup>5</sup>   |         |                        |      |                        |                        |
|                                   | Total               | 103  | 3.05×10 <sup>7</sup>  |                        |         |                        |      |                        |                        |
| Interburst–Burst emission rate    |                     |      |                       |                        |         |                        |      |                        |                        |
| Burst (log <sub>10</sub> )        | Among groups        | 10   | 5.30                  | 0.53                   | 29.28   | 1.51×10 <sup>-24</sup> | 0.76 | 0.61                   | 0.89                   |
|                                   | Within groups       | 93   | 1.68                  | 0.02                   |         |                        |      |                        |                        |
|                                   | Total               | 103  | 6.98                  |                        |         |                        |      |                        |                        |
| Interburst                        | Among groups        | 10   | 4.26×10 <sup>-6</sup> | 4.26×10 <sup>-7</sup>  | 92.14   | 0                      | 0.91 | 0.84                   | 0.96                   |
|                                   | Within groups       | 93   | 4.30×10 <sup>-7</sup> | 4.62×10 <sup>-9</sup>  |         |                        |      |                        |                        |
|                                   | Total               | 103  |                       |                        |         |                        |      |                        |                        |

| Components                                                                       | Source of variation | d.f. | SS                    | MS                    | <i>F</i> -ratio | <i>P</i>               | r    | Lower confidence limit | Upper confidence limit |
|----------------------------------------------------------------------------------|---------------------|------|-----------------------|-----------------------|-----------------|------------------------|------|------------------------|------------------------|
| Pulsation volume                                                                 |                     |      |                       |                       |                 |                        |      |                        |                        |
| Burst ( $\log_{10}$ )                                                            | Among groups        | 8    | 13.75                 | 1.72                  | 83.15           | 0                      | 0.59 | 0.42                   | 0.81                   |
|                                                                                  | Within groups       | 541  | 11.19                 | 0.02                  |                 |                        |      |                        |                        |
|                                                                                  | Total               | 549  | 24.94                 |                       |                 |                        |      |                        |                        |
| Interburst ( $\log_{10}$ )                                                       | Among groups        | 8    | 18.80                 | 2.35                  | 9.09            | $9.0 \times 10^{-12}$  | 0.12 | 0.06                   | 0.31                   |
|                                                                                  | Within groups       | 541  | $1.39 \times 10^2$    | 0.26                  |                 |                        |      |                        |                        |
|                                                                                  | Total               | 549  | $1.58 \times 10^2$    |                       |                 |                        |      |                        |                        |
| Pulsation duration                                                               |                     |      |                       |                       |                 |                        |      |                        |                        |
| Burst                                                                            | Among groups        | 8    | $4.33 \times 10^3$    | $5.41 \times 10^2$    | 5.68            | $6.0 \times 10^{-7}$   | 0.08 | 0.03                   | 0.21                   |
|                                                                                  | Within groups       | 541  | $5.16 \times 10^4$    | 95.38                 |                 |                        |      |                        |                        |
|                                                                                  | Total               | 549  | $5.59 \times 10^4$    |                       |                 |                        |      |                        |                        |
| Interburst ( $\log_{10}$ )                                                       | Among groups        | 8    | 42.19                 | 5.27                  | 11.95           | $9.0 \times 10^{-16}$  | 0.16 | 0.08                   | 0.37                   |
|                                                                                  | Within groups       | 541  | $2.39 \times 10^2$    | 0.44                  |                 |                        |      |                        |                        |
|                                                                                  | Total               | 549  | $2.81 \times 10^2$    |                       |                 |                        |      |                        |                        |
| Pulsation emission rate                                                          |                     |      |                       |                       |                 |                        |      |                        |                        |
| Burst ( $\log_{10}$ )                                                            | Among groups        | 8    | 5.51                  | 0.69                  | 39.79           | 0                      | 0.40 | 0.25                   | 0.67                   |
|                                                                                  | Within groups       | 541  | 9.37                  | 0.02                  |                 |                        |      |                        |                        |
|                                                                                  | Total               | 549  | 14.88                 |                       |                 |                        |      |                        |                        |
| Interburst ( $\log_{10}$ )                                                       | Among groups        | 8    | 13.42                 | 1.68                  | 12.27           | $3.0 \times 10^{-16}$  | 0.16 | 0.08                   | 0.38                   |
|                                                                                  | Within groups       | 541  | 73.66                 | 0.14                  |                 |                        |      |                        |                        |
|                                                                                  | Total               | 549  | 87.08                 |                       |                 |                        |      |                        |                        |
| Metabolic rate                                                                   |                     |      |                       |                       |                 |                        |      |                        |                        |
| (males and females) ( $\log_{10}$ )                                              | Among groups        | 19   | 3.47                  | 0.18                  | 6.25            | $2.01 \times 10^{-9}$  | 0.51 | 0.35                   | 0.69                   |
|                                                                                  | Within groups       | 80   | 2.33                  | 0.03                  |                 |                        |      |                        |                        |
|                                                                                  | Total               | 99   | 5.80                  |                       |                 |                        |      |                        |                        |
| (females) ( $\log_{10}$ )                                                        | Among groups        | 16   | 2.57                  | 0.16                  | 5.67            | $1.57 \times 10^{-7}$  | 0.48 | 0.32                   | 0.67                   |
|                                                                                  | Within groups       | 68   | 1.93                  | 0.03                  |                 |                        |      |                        |                        |
|                                                                                  | Total               | 84   | 4.50                  |                       |                 |                        |      |                        |                        |
| Frequency (males and females)                                                    | Among groups        | 19   | $1.98 \times 10^4$    | $1.04 \times 10^3$    | 3.37            | $5.9 \times 10^{-5}$   | 0.31 | 0.15                   | 0.52                   |
|                                                                                  | Within groups       | 87   | $2.69 \times 10^4$    | $3.10 \times 10^2$    |                 |                        |      |                        |                        |
|                                                                                  | Total               | 106  | $4.68 \times 10^4$    |                       |                 |                        |      |                        |                        |
| (females)                                                                        | Among groups        | 16   | $1.58 \times 10^4$    | $9.87 \times 10^2$    | 2.78            | 0.001                  | 0.25 | 0.10                   | 0.45                   |
|                                                                                  | Within groups       | 76   | $2.69 \times 10^4$    | $3.55 \times 10^2$    |                 |                        |      |                        |                        |
|                                                                                  | Total               | 92   | $4.27 \times 10^4$    |                       |                 |                        |      |                        |                        |
| Mass (males and females)                                                         | Among groups        | 19   | 0.64                  | 0.03                  | 15.12           | $3.93 \times 10^{-19}$ | 0.74 | 0.61                   | 0.85                   |
|                                                                                  | Within groups       | 80   | 0.18                  | $2.0 \times 10^{-3}$  |                 |                        |      |                        |                        |
|                                                                                  | Total               | 99   | 0.82                  |                       |                 |                        |      |                        |                        |
| Flutter period and interbursts for the three cyclic patterns (males and females) |                     |      |                       |                       |                 |                        |      |                        |                        |
| Volume                                                                           | Among groups        | 19   | $2.54 \times 10^{-4}$ | $1.34 \times 10^{-5}$ | 24.13           | 0                      | 0.33 | 0.22                   | 0.49                   |
|                                                                                  | Within groups       | 754  | $4.17 \times 10^{-4}$ | $5.53 \times 10^{-7}$ |                 |                        |      |                        |                        |
|                                                                                  | Total               | 773  | $6.71 \times 10^{-4}$ |                       |                 |                        |      |                        |                        |
| Duration                                                                         | Among groups        | 19   | $5.87 \times 10^7$    | $3.09 \times 10^6$    | 50.82           | 0                      | 0.51 | 0.38                   | 0.68                   |
|                                                                                  | Within groups       | 754  | $4.59 \times 10^7$    | $6.08 \times 10^4$    |                 |                        |      |                        |                        |
|                                                                                  | Total               | 773  | $10.46 \times 10^7$   |                       |                 |                        |      |                        |                        |
| Emission rate                                                                    | Among groups        | 19   | $6.64 \times 10^{-6}$ | $3.49 \times 10^{-7}$ | 5.65            | $2.88 \times 10^{-13}$ | 0.09 | 0.05                   | 0.18                   |
|                                                                                  | Within groups       | 754  | $4.66 \times 10^{-5}$ | $6.18 \times 10^{-8}$ |                 |                        |      |                        |                        |
|                                                                                  | Total               | 773  | $5.32 \times 10^{-5}$ |                       |                 |                        |      |                        |                        |

| Components                                                               | Source of variation | d.f. | SS                   | MS    | <i>F</i> -ratio | <i>P</i> | r    | Lower confidence limit | Upper confidence limit |
|--------------------------------------------------------------------------|---------------------|------|----------------------|-------|-----------------|----------|------|------------------------|------------------------|
| Open period and bursts for the three cyclic patterns (males and females) |                     |      |                      |       |                 |          |      |                        |                        |
| Volume (log <sub>10</sub> )                                              | Among groups        | 19   | 1.87×10 <sup>2</sup> | 9.86  | 63.99           | 0        | 0.57 | 0.43                   | 0.72                   |
|                                                                          | Within groups       | 754  | 1.16×10 <sup>2</sup> | 0.15  |                 |          |      |                        |                        |
|                                                                          | Total               | 773  | 3.04×10 <sup>2</sup> |       |                 |          |      |                        |                        |
| Duration (log <sub>10</sub> )                                            | Among groups        | 19   | 2.10×10 <sup>2</sup> | 11.0  | 89.83           | 0        | 0.65 | 0.52                   | 0.79                   |
|                                                                          | Within groups       | 754  | 92.7                 | 0.12  |                 |          |      |                        |                        |
|                                                                          | Total               | 773  | 3.03×10 <sup>2</sup> |       |                 |          |      |                        |                        |
| Emission rate (log <sub>10</sub> )                                       | Among groups        | 19   | 10.34                | 0.55  | 28.52           | 0        | 0.37 | 0.25                   | 0.54                   |
|                                                                          | Within groups       | 754  | 14.47                | 0.02  |                 |          |      |                        |                        |
|                                                                          | Total               | 773  | 24.81                |       |                 |          |      |                        |                        |
| Flutter period and interbursts for the three cyclic patterns (females)   |                     |      |                      |       |                 |          |      |                        |                        |
| Volume                                                                   | Among groups        | 16   | 2.56×10 <sup>2</sup> | 16.01 | 31.52           | 0        | 0.43 | 0.31                   | 0.61                   |
|                                                                          | Within groups       | 700  | 3.55×10 <sup>2</sup> | 0.51  |                 |          |      |                        |                        |
|                                                                          | Total               | 716  | 6.11×10 <sup>2</sup> |       |                 |          |      |                        |                        |
| Duration                                                                 | Among groups        | 16   | 3.09×10 <sup>2</sup> | 19.32 | 33.99           | 0        | 0.45 | 0.33                   | 0.63                   |
|                                                                          | Within groups       | 700  | 3.98×10 <sup>2</sup> | 0.57  |                 |          |      |                        |                        |
|                                                                          | Total               | 716  | 7.07×10 <sup>2</sup> |       |                 |          |      |                        |                        |
| Emission rate                                                            | Among groups        | 16   | 31.43                | 1.96  | 15.12           | 0        | 0.26 | 0.17                   | 0.42                   |
|                                                                          | Within groups       | 700  | 90.88                | 0.13  |                 |          |      |                        |                        |
|                                                                          | Total               | 716  | 1.22×10 <sup>2</sup> |       |                 |          |      |                        |                        |
| Open period and bursts for the three cyclic patterns (females)           |                     |      |                      |       |                 |          |      |                        |                        |
| Volume (log <sub>10</sub> )                                              | Among groups        | 16   | 1.39×10 <sup>2</sup> | 8.71  | 52.87           | 0        | 0.57 | 0.43                   | 0.72                   |
|                                                                          | Within groups       | 700  | 1.15×10 <sup>2</sup> | 0.17  |                 |          |      |                        |                        |
|                                                                          | Total               | 716  | 2.54×10 <sup>2</sup> |       |                 |          |      |                        |                        |
| Duration (log <sub>10</sub> )                                            | Among groups        | 16   | 1.60×10 <sup>2</sup> | 10.01 | 77.30           | 0        | 0.66 | 0.53                   | 0.79                   |
|                                                                          | Within groups       | 700  | 90.64                | 0.13  |                 |          |      |                        |                        |
|                                                                          | Total               | 716  | 2.50×10 <sup>2</sup> |       |                 |          |      |                        |                        |
| Emission rate (log <sub>10</sub> )                                       | Among groups        | 16   | 10.46                | 0.65  | 33.45           | 0        | 0.45 | 0.32                   | 0.63                   |
|                                                                          | Within groups       | 700  | 13.68                | 0.02  |                 |          |      |                        |                        |
|                                                                          | Total               | 716  | 24.14                |       |                 |          |      |                        |                        |

Data were log<sub>10</sub> transformed in some cases to normalize the distributions.

Repeatabilities were calculated for females unless indicated otherwise.

Sample sizes for individuals used for each pattern are given in Table 1.

Appendix 1B. ANOVA table used to calculate the repeatability values and their upper and lower 95% confidence limits for each of the components of the cyclic patterns, as well as comparable components across all three of the cyclic patterns, metabolic rate, frequency and body mass, with body mass included as a covariate

| Components                               | Source of variation | d.f. | SS                    | MS                    | F-ratio | P                      | r    | Lower confidence limit | Upper confidence limit |
|------------------------------------------|---------------------|------|-----------------------|-----------------------|---------|------------------------|------|------------------------|------------------------|
| DGC volume                               |                     |      |                       |                       |         |                        |      |                        |                        |
| F-period                                 | Among groups        | 8    | 2.05                  | 0.26                  | 3.03    | 0.007                  | 0.23 | 0.06                   | 0.55                   |
|                                          | Within groups       | 52   | 4.40                  | 0.08                  |         |                        |      |                        |                        |
|                                          | Total               | 60   | 6.45                  |                       |         |                        |      |                        |                        |
| DGC duration                             |                     |      |                       |                       |         |                        |      |                        |                        |
| C-period                                 | Among groups        | 8    | 2.02×10 <sup>6</sup>  | 2.53×10 <sup>5</sup>  | 3.59    | 0.002                  | 0.28 | 0.10                   | 0.60                   |
|                                          | Within groups       | 52   | 3.66×10 <sup>6</sup>  | 7.03×10 <sup>4</sup>  |         |                        |      |                        |                        |
|                                          | Total               | 60   | 5.68×10 <sup>6</sup>  |                       |         |                        |      |                        |                        |
| F-period                                 | Among groups        | 8    | 1.50×10 <sup>6</sup>  | 1.87×10 <sup>5</sup>  | 5.05    | 1.14×10 <sup>-4</sup>  | 0.38 | 0.17                   | 0.68                   |
|                                          | Within groups       | 52   | 1.93×10 <sup>6</sup>  | 3.71×10 <sup>4</sup>  |         |                        |      |                        |                        |
|                                          | Total               | 60   | 3.43×10 <sup>6</sup>  |                       |         |                        |      |                        |                        |
| Interburst–Burst volume                  |                     |      |                       |                       |         |                        |      |                        |                        |
| Burst (log <sub>10</sub> )               | Among groups        | 10   | 1.50                  | 0.15                  | 3.63    | 4.18×10 <sup>-4</sup>  | 0.22 | 0.09                   | 0.48                   |
|                                          | Within groups       | 92   | 3.80                  | 0.04                  |         |                        |      |                        |                        |
|                                          | Total               | 102  | 5.30                  |                       |         |                        |      |                        |                        |
| Interburst–Burst duration                |                     |      |                       |                       |         |                        |      |                        |                        |
| Burst                                    | Among groups        | 10   | 3.86×10 <sup>6</sup>  | 3.86×10 <sup>5</sup>  | 7.34    | 1.9×10 <sup>-8</sup>   | 0.41 | 0.24                   | 0.67                   |
|                                          | Within groups       | 92   | 4.84×10 <sup>6</sup>  | 5.26×10 <sup>4</sup>  |         |                        |      |                        |                        |
|                                          | Total               | 102  | 8.70×10 <sup>6</sup>  |                       |         |                        |      |                        |                        |
| Interburst–Burst emission rate           |                     |      |                       |                       |         |                        |      |                        |                        |
| Interburst                               | Among groups        | 10   | 1.85×10 <sup>-6</sup> | 1.85×10 <sup>-7</sup> | 42.73   | 2.85×10 <sup>-30</sup> | 0.82 | 0.70                   | 0.92                   |
|                                          | Within groups       | 92   | 3.99×10 <sup>-7</sup> | 4.34×10 <sup>-9</sup> |         |                        |      |                        |                        |
|                                          | Total               | 102  | 1.27×10 <sup>2</sup>  |                       |         |                        |      |                        |                        |
| Pulsation volume                         |                     |      |                       |                       |         |                        |      |                        |                        |
| Burst (log <sub>10</sub> )               | Among groups        | 8    | 14.45                 | 1.8                   | 93.68   | 0                      | 0.62 | 0.42                   | 0.81                   |
|                                          | Within groups       | 540  | 10.41                 | 0.02                  |         |                        |      |                        |                        |
|                                          | Total               | 548  | 24.86                 |                       |         |                        |      |                        |                        |
| Interburst (log <sub>10</sub> )          | Among groups        | 8    | 20.86                 | 2.61                  | 10.27   | 2.08×10 <sup>-13</sup> | 0.14 | 0.07                   | 0.34                   |
|                                          | Within groups       | 540  | 1.37×10 <sup>2</sup>  | 0.25                  |         |                        |      |                        |                        |
|                                          | Total               | 548  | 1.58×10 <sup>2</sup>  |                       |         |                        |      |                        |                        |
| Pulsation duration                       |                     |      |                       |                       |         |                        |      |                        |                        |
| Burst                                    | Among groups        | 8    | 4.14×10 <sup>3</sup>  | 5.18×10 <sup>2</sup>  | 5.49    | 1.12×10 <sup>-6</sup>  | 0.07 | 0.03                   | 0.21                   |
|                                          | Within groups       | 541  | 5.10×10 <sup>4</sup>  | 94.38                 |         |                        |      |                        |                        |
|                                          | Total               | 549  | 5.52×10 <sup>4</sup>  |                       |         |                        |      |                        |                        |
| Interburst (log <sub>10</sub> )          | Among groups        | 8    | 47.40                 | 5.93                  | 13.99   | 1.48×10 <sup>-18</sup> | 0.19 | 0.08                   | 0.37                   |
|                                          | Within groups       | 540  | 2.30×10 <sup>2</sup>  | 0.42                  |         |                        |      |                        |                        |
|                                          | Total               | 548  | 2.77×10 <sup>2</sup>  |                       |         |                        |      |                        |                        |
| Emission rate                            |                     |      |                       |                       |         |                        |      |                        |                        |
| Interburst (log <sub>10</sub> )          | Among groups        | 8    | 13.37                 | 1.67                  | 12.59   | 1.23×10 <sup>-16</sup> | 0.17 | 0.10                   | 0.41                   |
|                                          | Within groups       | 540  | 71.41                 | 0.13                  |         |                        |      |                        |                        |
|                                          | Total               | 548  | 84.78                 |                       |         |                        |      |                        |                        |
| Metabolic rate                           |                     |      |                       |                       |         |                        |      |                        |                        |
| (males and females) (log <sub>10</sub> ) | Among groups        | 19   | 1.97                  | 0.05                  | 2.39    | 0.004                  | 0.22 | 0.07                   | 0.42                   |
|                                          | Within groups       | 79   | 1.69                  | 0.02                  |         |                        |      |                        |                        |
|                                          | Total               | 98   | 2.66                  |                       |         |                        |      |                        |                        |
| (females) (log <sub>10</sub> )           | Among groups        | 16   | 0.92                  | 0.06                  | 3.05    | 7.14×10 <sup>-4</sup>  | 0.29 | 0.12                   | 0.52                   |
|                                          | Within groups       | 67   | 1.27                  | 0.02                  |         |                        |      |                        |                        |
|                                          | Total               | 83   | 2.19                  |                       |         |                        |      |                        |                        |

| Components                                                                            | Source of variation | d.f. | SS                    | MS                    | F-ratio | P                     | r    | Lower confidence limit | Upper confidence limit |
|---------------------------------------------------------------------------------------|---------------------|------|-----------------------|-----------------------|---------|-----------------------|------|------------------------|------------------------|
| Frequency                                                                             |                     |      |                       |                       |         |                       |      |                        |                        |
| (males and females)                                                                   | Among groups        | 19   | 2.11×10 <sup>4</sup>  | 1.11×10 <sup>3</sup>  | 3.76    | 1.25×10 <sup>-5</sup> | 0.35 | 0.19                   | 0.55                   |
|                                                                                       | Within groups       | 86   | 2.55×10 <sup>4</sup>  | 2.96×10 <sup>2</sup>  |         |                       |      |                        |                        |
|                                                                                       | Total               | 105  | 4.66×10 <sup>4</sup>  |                       |         |                       |      |                        |                        |
| (females)                                                                             | Among groups        | 16   | 1.71×10 <sup>4</sup>  | 1.07×10 <sup>3</sup>  | 3.16    | 3.96×10 <sup>-4</sup> | 0.29 | 0.13                   | 0.51                   |
|                                                                                       | Within groups       | 75   | 2.54×10 <sup>4</sup>  | 3.39×10 <sup>2</sup>  |         |                       |      |                        |                        |
|                                                                                       | Total               | 91   | 4.25×10 <sup>4</sup>  |                       |         |                       |      |                        |                        |
| Flutter period and interbursts for the three cyclic patterns (males and females)      |                     |      |                       |                       |         |                       |      |                        |                        |
| Volume                                                                                | Among groups        | 19   | 2.54×10 <sup>-3</sup> | 1.34×10 <sup>-4</sup> | 42.45   | 0                     | 0.47 | 0.35                   | 0.63                   |
|                                                                                       | Within groups       | 753  | 2.4×10 <sup>-3</sup>  | 3.19×10 <sup>-6</sup> |         |                       |      |                        |                        |
|                                                                                       | Total               | 772  | 4.94×10 <sup>-3</sup> |                       |         |                       |      |                        |                        |
| Duration                                                                              | Among groups        | 19   | 6.12×10 <sup>7</sup>  | 3.22×10 <sup>6</sup>  | 54.35   | 0                     | 0.53 | 0.41                   | 0.68                   |
|                                                                                       | Within groups       | 753  | 4.47×10 <sup>7</sup>  | 5.90×10 <sup>4</sup>  |         |                       |      |                        |                        |
|                                                                                       | Total               | 772  | 10.59×10 <sup>7</sup> |                       |         |                       |      |                        |                        |
| Emission rate                                                                         | Among groups        | 19   | 2.63×10 <sup>-5</sup> | 1.38×10 <sup>-6</sup> | 15.60   | 0                     | 0.24 | 0.16                   | 0.38                   |
|                                                                                       | Within groups       | 753  | 6.67×10 <sup>-5</sup> | 8.86×10 <sup>-8</sup> |         |                       |      |                        |                        |
|                                                                                       | Total               | 772  | 9.30×10 <sup>-5</sup> |                       |         |                       |      |                        |                        |
| Open period and bursts for the three cyclic patterns (males and females)              |                     |      |                       |                       |         |                       |      |                        |                        |
| Volume (log <sub>10</sub> )                                                           | Among groups        | 19   | 1.29×10 <sup>2</sup>  | 6.81                  | 69.04   | 0                     | 0.59 | 0.47                   | 0.73                   |
|                                                                                       | Within groups       | 753  | 74.24                 | 0.10                  |         |                       |      |                        |                        |
|                                                                                       | Total               | 772  | 2.03×10 <sup>2</sup>  |                       |         |                       |      |                        |                        |
| Duration (log <sub>10</sub> )                                                         | Among groups        | 19   | 2.20×10 <sup>2</sup>  | 11.6                  | 138.12  | 0                     | 0.74 | 0.64                   | 0.85                   |
|                                                                                       | Within groups       | 753  | 63.22                 | 0.08                  |         |                       |      |                        |                        |
|                                                                                       | Total               | 772  | 2.83×10 <sup>2</sup>  |                       |         |                       |      |                        |                        |
| Flutter period and interbursts for the three cyclic patterns (females)                |                     |      |                       |                       |         |                       |      |                        |                        |
| Volume                                                                                | Among groups        | 16   | 3.95×10 <sup>2</sup>  | 24.68                 | 43.14   | 0                     | 0.51 | 0.39                   | 0.68                   |
|                                                                                       | Within groups       | 700  | 3.99×10 <sup>2</sup>  | 0.57                  |         |                       |      |                        |                        |
|                                                                                       | Total               | 716  | 6.11×10 <sup>2</sup>  |                       |         |                       |      |                        |                        |
| Duration                                                                              | Among groups        | 16   | 3.45×10 <sup>2</sup>  | 21.54                 | 38.29   | 0                     | 0.48 | 0.36                   | 0.66                   |
|                                                                                       | Within groups       | 700  | 3.93×10 <sup>2</sup>  | 0.56                  |         |                       |      |                        |                        |
|                                                                                       | Total               | 716  | 7.07×10 <sup>2</sup>  |                       |         |                       |      |                        |                        |
| Emission rate                                                                         | Among groups        | 16   | 34.94                 | 2.18                  | 14.23   | 0                     | 0.25 | 0.16                   | 0.41                   |
|                                                                                       | Within groups       | 700  | 90.88                 | 0.15                  |         |                       |      |                        |                        |
|                                                                                       | Total               | 716  | 1.07×10 <sup>2</sup>  |                       |         |                       |      |                        |                        |
| Open period and bursts for the three cyclic patterns (females)                        |                     |      |                       |                       |         |                       |      |                        |                        |
| Volume (log <sub>10</sub> )                                                           | Among groups        | 16   | 1.10×10 <sup>2</sup>  | 6.94                  | 74.25   | 0                     | 0.65 | 0.52                   | 0.79                   |
|                                                                                       | Within groups       | 700  | 65.39                 | 0.09                  |         |                       |      |                        |                        |
|                                                                                       | Total               | 716  | 1.75×10 <sup>2</sup>  |                       |         |                       |      |                        |                        |
| Duration (log <sub>10</sub> )                                                         | Among groups        | 16   | 1.67×10 <sup>2</sup>  | 10.47                 | 121.93  | 0                     | 0.75 | 0.65                   | 0.86                   |
|                                                                                       | Within groups       | 700  | 60.13                 | 0.09                  |         |                       |      |                        |                        |
|                                                                                       | Total               | 716  | 2.27×10 <sup>2</sup>  |                       |         |                       |      |                        |                        |
| Data were log <sub>10</sub> transformed in some cases to normalize the distributions. |                     |      |                       |                       |         |                       |      |                        |                        |
| Repeatabilities were calculated for females unless indicated otherwise.               |                     |      |                       |                       |         |                       |      |                        |                        |
| Sample sizes for individuals used for each pattern are given in Table 1.              |                     |      |                       |                       |         |                       |      |                        |                        |
